1 Beyond mean fitness: demographic stochasticity and resilience  
2 matter at tree species climatic edges.

3 Arnaud Guyennon<sup>1</sup>, Björn Reineking<sup>1</sup>, Roberto Salguero-Gomez<sup>2</sup>, Jonas Dahlgren<sup>3</sup>,  
4 Aleksi Lehtonen<sup>4</sup>, Sophia Ratcliffe<sup>5</sup>, Paloma Ruiz-Benito<sup>6,7</sup>, Miguel A. Zavala<sup>8</sup>, and  
5 Georges Kunstler<sup>1</sup>

6 <sup>1</sup>Univ. Grenoble Alpes, INRAE, LESSEM, 2 rue de la Papeterie - BP 76 F-38402  
7 St-Martin-d'Hères, France

8 <sup>2</sup>Department of Zoology, University of Oxford, 11a Mansfield Road, Oxford, OX1  
9 3SZ, United Kingdom

10 <sup>3</sup>Swedish University of Agricultural Sciences, Umeå, 90183 Sweden

11 <sup>4</sup>Natural Resources Institute Finland (Luke), Latokartanonkaari 9 FI-00790 Helsinki  
12 Finland

13 <sup>5</sup>NBN Trust, Unit F, 14-18 St Mary's Gate, Lace Market, Nottingham NG1 1PF

14 <sup>6</sup>Departamento de Biología y Geología, Física y Química Inorgánica, Escuela  
15 Superior de Ciencias Experimentales y Tecnología, Universidad Rey Juan Carlos,  
16 C/ Tulipán s/n, 28933, Móstoles (Madrid), Spain

17 <sup>7</sup>Grupo de Ecología y Restauración Forestal, Departamento de Ciencias de la Vida,  
18 Universidad de Alcalá, Edificio de Ciencias, Campus Universitario, 28805 Alcalá de  
19 Henares, Madrid, Spain

20 August 19, 2022

21 **Running title:** Tree population stochasticity at the edge

22 **Corresponding Author:** Georges Kunstler, [georges.kunstler@inrae.fr](mailto:georges.kunstler@inrae.fr), +33 (0)4 76 76 27 61

23 **Authorship** A.G. and G.K. conceived the ideas and designed methodology with the help of S.R.,  
24 R.S.-G.; S.R. formatted the forest inventory and climatic data with the help of P.R.-B., M.A.Z.,  
25 G.K. and A.L.; G.K. and A.G. analysed the data and developed the IPM with the help of B.R.,

26 R.S.-G.; A.G. and G.K. led the writing of the manuscript with important inputs from B.R., S.R.  
27 and R.S.-G.

28 **Data Accessibility Statement** No new data are associated with this work. Data are available  
29 from Spanish National Forest Inventory  
30 ([https://www.miteco.gob.es/en/biodiversidad/servicios/banco-datos-naturaleza/  
informacion-disponible/ifn3\\_bbdd\\_descargas.htm.aspx](https://www.miteco.gob.es/en/biodiversidad/servicios/banco-datos-naturaleza/informacion-disponible/ifn3_bbdd_descargas.htm.aspx)) and  
31 and  
32 [https://www.miteco.gob.es/en/biodiversidad/servicios/banco-datos-naturaleza/  
informacion-disponible/ifn2\\_descargas.aspx](https://www.miteco.gob.es/en/biodiversidad/servicios/banco-datos-naturaleza/informacion-disponible/ifn2_descargas.aspx)), French National Forest Inventory  
33 (<https://inventaire-forestier.ign.fr/spip.php?article532>) and German National Forest  
34 Inventory (<https://bwi.info/Download/de/BWI-Basisdaten/ACCESS2003/>). The Swedish and  
35 Finnish data with blurred geographic coordinates and the climatic data used in the analysis are  
36 available (Ratcliffe et al. 2020) from the Dryad Digital Repository  
37 (<https://doi.org/10.5061/dryad.wm37p<200b>vmkw>).

38 **Keywords:** Species Range, Population Dynamics, European tree species, Stochasticity,  
39 Recovery, Integral Projection Model.  
40

## Abstract

**Aim:** Linking local population dynamics and species distributions is critical to predicting the impacts of climate change. While many studies focus on the mean fitness of populations, theory shows that species distributions can be shaped by demographic stochasticity or population resilience. Here we examine how mean fitness (measured by invasion rate), demographic stochasticity, and resilience (measured by the ability to recover from disturbance) constrain populations at the edges compared to the climatic center.

**Location:** Europe: Spain, France, Germany, Finland, and Sweden.

**Period:** Forest inventory data used for fitting the models cover the period from 1985 to 2013.

**Major taxa:** Dominant European tree species; Angiosperms and Gymnosperms.

**Methods:** We developed dynamic population models covering the entire life cycle of 25 European tree species with climatically dependent recruitment models fitted to forest inventory data. We then ran simulations using integral projection and individual-based models to test how invasion rates, risk of stochastic extinction, and ability to recover from stochastic disturbances differ between the center and edges of species' climatic niches.

**Results:** Results varied among species, but in general, demographic constraints were stronger at warm edges and for species in harsher climates. Conversely, recovery was more limiting at cold edges. In addition, we found that for several species, constraints at the edges were due to demographic stochasticity and recovery capacity rather than mean fitness.

**Main conclusion:** Our results highlight that mean fitness is not the only mechanism at play at the edges; demographic stochasticity and population capacity to recover also matter for European tree species. To understand how climate change will drive species range shifts, future studies will need to analyse the interplay between population mean growth rate and stochastic demographic processes as well as disturbances.

## 1 Introduction

Given the magnitude of the projected climate changes, the distribution of tree species across Europe is likely to change significantly (Cheaib et al. 2012). Understanding how local population dynamics control large-scale tree species distributions is crucial to predict range shifts (Schurr et al. 2012). However, we still have a very crude understanding of this relationship.

The Hutchinsonian niche concept states that species ranges correspond to the environmental conditions where population performance allows them to persist (Godsoe, Jankowski, Holt & Gravel 2017; Hutchinson 1978). Although this relationship could also be influenced by other processes, such as dispersal and non-equilibrium dynamics (Holt, Keitt, Lewis, Maurer & Taper 2005), most empirical studies have focused on the importance of local tree population growth rate for maintaining viable populations within the species range (Csergo et al. 2017; Le Squin, Boulangeat & Gravel

2021; Purves 2009). However, theoretical studies have demonstrated that the links between species  
distributions and local population dynamics could be more complex than just an effect on mean  
population growth rate (Holt, Keitt, Lewis, Maurer & Taper 2005; Sexton, McIntyre, Angert & Rice  
2009).

Holt, Keitt, Lewis, Maurer & Taper (2005) proposed three mechanisms that could lead to stable  
range limits. The first mechanism is based on the classical idea that species are present where their  
mean population growth rate allows their presence to be maintained. Previous studies generally used  
density-independent models and were thus estimating mean finite population growth rate (Csergo  
et al. 2017). However, for populations with strong density-dependence, such as trees, invasion  
rate (net reproduction rate when rare) is more appropriate than population growth rate (Le Squin,  
Boulangéat & Gravel 2021; Pagel et al. 2020; Purves 2009). The second mechanism, demographic  
stochasticity, describes the random fluctuations in population size due to probabilistic discrete events  
of individual tree recruitment and death (quantified by the demographic variance, see Melbourne  
2012, for an in-depth definition), which might ultimately result in local extinction. Extinction  
risk increases when demographic variance increases or when the number of individuals decreases  
(Engen, Sæther & Møller 2001). The third mechanism, environmental stochasticity, assumes that  
temporal variations in extrinsic environmental conditions, such as climatic or disturbances, may  
affect population persistence and thus species distribution (Holt, Keitt, Lewis, Maurer & Taper  
2005; Ovaskainen & Meerson 2010). In forest ecosystems, the ability of the population to recover  
from external disturbance is critical (Seidl et al. 2017). The last two mechanisms, demographic and  
environmental stochasticity, could explain why populations experience local extinctions even when  
mean climatic conditions are favorable (Holt, Keitt, Lewis, Maurer & Taper 2005).

Recently, several studies have assessed how population dynamics drive tree species distributions  
using National Forest Inventories (hereafter NFIs) (Kunstler et al. 2021; Le Squin, Boulangéat &  
Gravel 2021; Purves 2009; Thuiller et al. 2014). However, to our knowledge, there have been no  
systematic tests of the respective roles of demographic and environmental stochasticity for range  
limits of tree species (but see Pagel et al. 2020, for shrub response to fire disturbance in South  
Africa), probably because most studies either ignored recruitment or assumed it was independent  
of climate (Kunstler et al. 2021; Le Squin, Boulangéat & Gravel 2021, but see Purves *et al.* 2009).  
Recruitment, however, is a key stage of the life cycle to properly explore the role of stochastic  
processes (Grubb 1977; Holt, Keitt, Lewis, Maurer & Taper 2005).

Here, we assessed the relative importance of the three mechanisms presented above on the  
continental distributions of 25 European tree species. We extended the integral projection model  
(IPM) recently developed for European tree species (Kunstler et al. 2021) by adding  
species-specific climate- and density-dependent recruitment models. The IPMs developed here  
describe the full life cycle of each species. As such they allowed us to estimate metrics of

113 population performance representative of the three mechanisms proposed by Holt, Keitt, Lewis,  
114 Maurer & Taper (2005) and then test how they differ between the centre and the edges of the  
115 species climatic niches (see Fig. 1 for an overview of the metrics and the tests). More specifically,  
116 we tested the following hypotheses: (H1) Mean population performance, measured by the invasion  
117 rate, decreases at the edge relative to the center (Brown 1984). (H2) The risk of stochastic  
118 extinction increases at the edge relative to the center because of a higher demographic  
119 stochasticity and/or a smaller tree density at equilibrium (Holt, Keitt, Lewis, Maurer & Taper  
120 2005). (H3) The ability to recover from stochastic disturbances decreases at the edge compared to  
121 the center. The type of constraints operating at the edge is likely to vary between edge types with  
122 different physiological constraints. Thus, we also tested whether the role of the three mechanisms  
123 (H1 to H3) differs between the hot and dry edge *vs.* the cold and wet edge (H4). Finally, we tested  
124 whether the strength of limitation at the edge is stronger for species' edges in the extremes of  
125 European climate (hot edges of hot-distributed species and cold edges of cold-distributed species,  
126 H5).

## 127 **2 Materials and Methods**

### 128 **2.1 Forest Inventory and climatic data**

129 **National Forest Inventory dataset** To fit vital rate functions (growth, survival, and  
130 recruitment), we used the European forest inventory data compiled in the FunDivEUROPE  
131 project (Baeten et al. 2013). The dataset contains information on individual trees in 91,528 plots  
132 across Spain, France, Germany, Sweden and Finland, with records of species identity, diameter at  
133 breast height (dbh), and status (alive, dead, harvested) at two surveys. These data allow to both  
134 track individual growth and survival and to describe local competition. The minimum dbh of trees  
135 was 10 cm and no data were available on either seed production by conspecific adult trees, or  
136 seedling and sapling growth/survival. We thus did not disentangle the different stages leading to  
137 the ingrowth of a 10 cm dbh tree (i.e. trees that grew larger than the 10 cm dbh threshold between  
138 two surveys).

139 Survey design varies between countries, but generally plots are circular with variable radii  
140 depending on tree size (largest radius ranging from 10 m to 25 m, see protocols in Supporting  
141 Information SI 1). We excluded from the analyses all plots with records of harvesting operations or  
142 disturbances between the two surveys, which would otherwise influence our estimation of local  
143 competition.

144 **Climate variables** Following Kunstler et al. (2021), we used two climatic variables known to  
145 control the physiological performance of trees to fit our vital rates functions: the sum of degree

146 days above  $5.5^{\circ}\text{C}$  (hereafter *sgdd*), and the water availability index (*wai*). *wai* is calculated as  
147  $\frac{(P - PET)}{PET}$  (Ratcliffe et al. 2017), with  $P$  the annual precipitation and  $PET$  the potential  
148 evapotranspiration. Daily temperature and  $P$  were extracted from Moreno & Hasenauer (2016),  
149 and  $PET$  from the Climatic Research Unit data (Harris, Jones, Osborn & Lister 2014). Climate  
150 variables were averaged over the years between the two surveys, plus two years before the first  
151 survey, to account for potential lag effects.

## 152 2.2 Integral Projection Model models

153 An IPM predicts the size distribution,  $n(z', t + 1)$ , of a population at time  $t + 1$  from its size  
154 distribution at time  $t$ ,  $n(z, t)$ , based on a kernel  $K(z', z)$  (with  $z$  and  $z'$  the size at time  $t$  and  
155  $t + 1$ ) (Easterling, Ellner & Dixon 2000). Here, we consider size as the diameter at breast height  
156 (dbh).  $K(z', z)$  can be split into the survival and radial growth kernel  $P(z', z)$  and the fecundity  
157 kernel  $F(z', z)$ , as follows :  $K(z', z) = P(z', z) + F(z', z)$ . The survival and radial growth (hereafter  
158 growth) kernel  $P(z', z)$  is defined as  $P(z', z) = s(z) * G(z', z)$ ,  $s$  being the survival function and  $G$   
159 the growth kernel. The fecundity kernel  $F(z', z)$  gives the size distribution of newly recruited trees  
160 at time  $t + 1$  as a function of the size distribution at time  $t$ .

161 Below we describe the fitting of the recruitment, growth and survival functions. Each of these  
162 vital rate functions were fitted separately for each species. The impact of climate on vital rates  
163 was modelled through two potential alternative shapes: asymptotic or quadratic polynomial. This  
164 allowed us to capture alternative climate responses such as increasing, decreasing, or bell-shaped.  
165 To account for uncertainty in the climatic response shape, for each species, we fitted 100 models to  
166 70% of resampled data and selected each time the best climatic response model based on the Akaike  
167 information criterion (i.e. lowest AIC; see Burnham & Anderson 2002). Then, we evaluated the  
168 goodness of fit on the remaining 30% of the data (see SI 2.2). In the remaining analysis we used  
169 the 100 models to translate the uncertainty in the vital rate functions into the metrics of population  
170 dynamics.

171 **Recruitment function** We developed a recruitment model that accounted for two main processes:  
172 fecundity of the conspecific trees (represented by a power function of the basal area of conspecifics),  
173 and the competitive effect of heterospecific and conspecific (represented by an exponential function  
174 of their basal area, see SI 2.3). After thorough exploration of different distributions for the number  
175 of recruited trees, we fitted for each species a model with a negative binomial distribution using  
176 the approach presented above for the climate response. Because the angle count sampling method  
177 used in the German NFI makes recruitment analysis difficult, we excluded this country from the  
178 recruitment analysis. We used country-specific intercepts to account for variance due to national  
179 specificities (e.g. differences in protocols between NFIs), and an offset for the different number of

180 years between surveys.

181 Finally, in the IPM, we included a delay in tree recruitment to account for the time it takes  
182 for a sapling to reach the minimum dbh, meaning that a newly recruited tree is integrated into the  
183 population only after 10 years (see SI 2.4).

184 **Growth and survival functions** The radial growth and survival were modelled as functions of  
185 dbh, basal area of competitors and climatic conditions (*sgdd* and *wai*) as well as country-specific  
186 intercepts (as for recruitment). A normal random plot effect accounting for unexplained variation  
187 at the plot level was included in the growth model. No random plot intercept was included in the  
188 survival model, because in most plots no individuals died between the surveys, making the estimation  
189 of a random plot effect difficult. Growth models were fitted with a log normal distribution. Survival  
190 models were fitted with a generalized linear model with a binomial error and a complementary log-  
191 log link with an offset representing the number of years between the two surveys to account for  
192 variable survey times between plots (Morris, Vesk & McCarthy 2013). Models with interactions  
193 between the climate variables and both size and competition were also tested, to allow trees to have  
194 different climatic response depending on their size or their competitive environment. Equations are  
195 presented in SI 2.2, and more details are given in Kunstler et al. (2021).

196 Harvesting is present in all populations and probably leads to a lower natural mortality rate  
197 compared to unmanaged forests. Thus, a fixed harvest rate was added to natural mortality in the  
198 kernel  $P$ . We chose to use the mean annual probability of harvesting over the entire dataset and not  
199 to include variability in the harvest rate because we are focusing on the climatic drivers of species  
200 distribution and not on the effect of management.

## 201 2.3 Simulations of population dynamics

We simulated dynamics of discretized size distribution  $\mathbf{X}_t$  (number of individuals per size classes, corresponding to integration of  $n(z, t)$  over each size class) with a matrix formulation of the IPM as follow:

$$\mathbf{X}_{t+1} = (\mathbf{P}(BA_t^{tot}) + \mathbf{F}(BA_t^{het}, BA_t^{con})) \times \mathbf{X}_t \quad (1)$$

202 with  $\mathbf{P}$  and  $\mathbf{F}$  the matrices representing the kernel  $P$  and  $F$  with the dbh range divided into 700  
203 bins (see SI 2.4 for the numerical integration). Due to the density-dependence of growth, survival,  
204 and recruitment rates, the matrix  $\mathbf{P}$  depends on the basal area of competitors at time  $t$ :  $BA_t^{tot}$ , and  
205 the matrix  $\mathbf{F}$  on heterospecific and conspecific basal area, respectively  $BA_t^{het}$  and  $BA_t^{con}$ .

206 To explore the effect of demographic stochasticity on the dynamics of small populations, we also  
207 developed an individual based model (IBM) based on the same vital rate functions as the IPM (see  
208 SI 2.6). For each species, we ran 100 IBM and IPM simulations using the 100 resampled vital rate  
209 functions to represent their uncertainty.

210 **Equilibrium** All population metrics, at the exception of invasion rate, were computed starting  
211 from equilibrium, because observed tree distributions at the climatic center or edges were highly  
212 variable. We identified the size distribution at equilibrium  $X_e$  for each species and climatic position  
213 by running simulations with various random initial states until the variations in  $\mathbf{X}_t$  were negligible.  
214 There is no direct analytical solution of the equilibrium for density-dependent IPMs. Still, we checked  
215 that our simulations matched the analytical solution for IPMs with a constant transition matrix  $\mathbf{P}$   
216 calculated at the equilibrium basal area (as proposed by Rebarber, Tenhumberg & Townley 2012;  
217 Townley, Rebarber & Tenhumberg 2012, see SI 2.5).

218 For a small number of species and models, simulations did not reach equilibrium because they  
219 predicted a continuous increase in basal area. We discarded models that continued to increase above  
220  $200 \text{ m}^2\text{ha}^{-1}$  of basal area at the end of the simulation (the observed maximum basal area in our  
221 dataset is  $126 \text{ m}^2\text{ha}^{-1}$ ). As simulations work on continuous population abundances, there is no strict  
222 extinction. However, there may be very low tree density, which will make the computation of some  
223 metrics numerically unstable (recovery from perturbations, for example). In the simulations, we  
224 defined a lower limit for basal area of  $1 \text{ m}^2\text{ha}^{-1}$  (corresponding to one tree of 10 cm in a circle of 10  
225 m diameter) under which populations were not analysed.

226 If a simulation did not lead to demographic equilibrium (i.e. basal area less than  $1 \text{ m}^2\text{ha}^{-1}$  or  
227 increasing above  $200 \text{ m}^2\text{ha}^{-1}$ ), the simulation was discarded from further analysis. Also, we fully  
228 excluded a species edge from the analysis when less than 50% of the models showed demographic  
229 equilibrium (see table S7 in Supplementary Information). In total, only about 9% of the resampled  
230 models did not lead to an equilibrium and 5 % of species' edges were excluded (see SI 2.5).

## 231 **2.4 Population metrics**

### 232 **2.4.1 Invasion rate**

233 Invasion rate was used to evaluate mean fitness. In size-structured populations, the invasion rate  
234 is measured by the net reproductive rate,  $R_0$ , of a rare invader (Falster, Brännström, Westoby &  
235 Dieckmann 2017). In our density-dependent IPM, we estimated  $R_0$  by assuming the basal area of the  
236 invader was small and had no density-dependent effects on the matrices  $\mathbf{F}$  and  $\mathbf{P}$ . Doing so allowed  
237 us to use the same equation as for density-independent IPMs (the dominant eigenvalue of the matrix  
238  $\mathbf{F} \cdot (\mathbf{I} - \mathbf{P}^{-1})$ , see SI 2.7 and Ellner, Childs, Rees, et al. 2016). As we considered that the invader  
239 was rare, we set the conspecific basal area to a low value of  $0.1 \text{ m}^2\text{ha}^{-1}$  in  $F$ . We computed  $R_0$   
240 for two conditions of heterospecific competition: no heterospecific competition (where  $BA^{het} = 0$ ),  
241 and a high level of heterospecific competition (where  $BA^{het} = 60 \text{ m}^2\text{ha}^{-1}$ , corresponding to a dense  
242 closed forest in our data).



## 243 **2.4.2 Demographic stochasticity**

244 To evaluate the effect of demographic stochasticity, we derived the time to extinction for finite  
245 populations with 250 IBM simulations for each species, climatic condition, and resampled model.  
246 We initiated simulations by randomly sampling a finite number of trees from the distribution at  
247 equilibrium  $X_e$  and for a surface of  $100 m^2$  and ran the simulation for 1000 years. Following Grimm  
248 & Wissel (2004), we extracted the parameter  $T_m$  from these simulations, which corresponds to the  
249 intrinsic mean time to extinction. While this provides estimates of time to extinction for a very  
250 small population that are likely to be much shorter than for large populations in the field, it has the  
251 advantage of providing a tool for comparing stochastic extinction between edge and center.

252 Then, we derived two metrics that drive time to extinction: the density at equilibrium and  
253 the demographic variance. Density at equilibrium was computed from long-term simulations, as  
254 presented above. We computed the demographic variance from time-series of the total reproductive  
255 values (Engen, Lande, Sæther & Dobson 2009; Jaffré & Le Galliard 2016) estimated with long-term  
256 IBM simulations (3000 years), on a plot area of 1 *ha* (see SI 2.7).

## 257 **2.4.3 Population disturbance recovery ability**

258 We used damping time to test a population's ability to recover from disturbances, and two metrics  
259 related to short-term responses. Damping time (i.e. the time to converge to a stable size structure  
260 after a disturbance) is independent of the size structure of perturbations (see computation in SI 2.7).  
261 This metric, however, does not account for short term transient evolution of the size distribution  
262 after a disturbance, as it is computed around equilibrium. Analytical metrics that characterize  
263 population transient dynamics can not be used with density dependent models (Capdevila, Stott,  
264 Beger & Salguero-Gómez 2020). We, thus, used simulations to derive two other metrics: i)  $T_0$  – the  
265 time for the first return to equilibrium density (regardless of the tree size distribution); and ii)  $T_{half}$   
266 – the time until the perturbation intensity was permanently halved. For each species, we disturbed  
267 its population at demographic equilibrium by reducing the density of the largest trees (above the  
268 diameter 66th percentile) by half and then simulated its dynamics for 1,000 years. We extracted the  
269 two metrics from these simulations. For systems that do not present oscillations (i.e. low damping  
270 time), these two metrics will be highly correlated.

## 271 **2.5 Response at the edge**

272 **Niche center and edge definitions** Due to the high correlation between the two climate  
273 variables, we defined the climatic position of each species along a single climatic gradient, the first  
274 axis of the principal component analysis of the two climatic variables (as Kunstler et al. 2021). For  
275 each species, the niche center was the median of the first axis, the hot edge the 5th percentile and  
276 the cold edge the 95th percentile. To ensure each species' edges corresponded to valid borders of

277 species distribution, we excluded species and edges where occurrence probability did not decline.  
278 Occurrence probability was computed using BIOMOD2 (Thuiller, Lafourcade, Engler & Araújo  
279 2009) using presence/absence data from Mauri, Strona & San-Miguel-Ayanz (2017) (see SI 3.2).

### 280 2.5.1 Tests of response at the edge

Using the 100 resampled species-specific IPMs, we predicted the seven metrics at the climatic center ( $M_{center}$ ), at the hot and dry climatic edge ( $M_{hot}$ ), and at the cold and wet climatic edge ( $M_{cold}$ ). We then measured the relative response at the edges as  $\Omega_{hot} = \log(\frac{M_{hot}}{M_{center}})$  and  $\Omega_{cold} = \log(\frac{M_{cold}}{M_{center}})$ . For each metric and edge type we tested whether  $\Omega = \log(\frac{M_{edge}}{M_{center}})$  was significantly different from zero (H1 to H4) using a mixed model with edge type effect (hot or cold) as a fixed effect and a random species effect:

$$\Omega_{sp,i}^{Edge} = K_{sp}^{edge} + \sigma_{sp}^{edge} + \sigma \quad (2)$$

281 where  $K_{sp}^{edge}$  is the edge effect.

282 To test whether the mean climatic position of the species influenced its response at the edge  
283 (H5), we analysed for each metric and edge type the relationship between  $\Omega$  and the species climatic  
284 center conditions. We performed a regression between the value of the median climatic condition  
285 and  $\Omega$  for each edge (taking into account the variance of the 100 resampled models). In addition,  
286 we tested the robustness of the relationships to the phylogenetic proximity of the tree species with  
287 a phylogenetic generalized least squares regression (see SI 5, Symonds & Blomberg (2014)).

288 All analysis were conducted in R cran (R Core Team 2021), vital rates were estimated using lme4  
289 (Bates, Mächler, Bolker & Walker 2014) and glmmTMB (Brooks et al. 2017).

290 Out of the 27 tree species analyzed, two were fully discarded: *Acer campestre* due to the absence  
291 of equilibrium, and *Prunus padus* due to the absence of decline in its prevalence at niche borders.

## 292 3 Results

### 293 3.1 Metrics of performance at edges relative to the center

294 **Invasion rate** The invasion rate was generally lower at the hot edge than at the center, both in the  
295 absence of and at high levels of heterospecific competition, Fig. 2. However, the overall effect across  
296 all species was stronger at high levels of heterospecific competition. In the absence of competition,  
297 55% of the studied species had a significantly negative relative response  $\Omega$ , while at high levels of  
298 competition 64% had significantly negative  $\Omega$  (see Table S7). Relative differences at the cold edge  
299 were not significant, with or without competition.

300 **Demographic stochasticity** The time to extinction was lower at the hot edge compared to the  
301 center, with  $\Omega$  significantly negative for 10 out of 22 species (45%) (Fig. 2). Of the two potential

302 drivers of time to extinction, only  $\Omega$  of tree density was also significantly less than zero at the hot  
303 edge (11 out of 22 species, 50%).  $\Omega$  of the demographic variance was not significantly positive at  
304 the hot edge. No significant effects were detected at the cold edge.

305 **Population disturbance recovery ability** Of the three metrics used to study recovery from  
306 disturbance, we found a significant effect across all species only for damping time; the damping time  
307 tended to be longer at the cold edge compared to the center, indicating slower recovery (8 out of  
308 15 species, 53%) (Fig. 2). There was no difference in damping time between the hot edge and the  
309 climatic center. Lastly, we found no differences at either edge type for the time to reach equilibrium  
310 density or the time until the perturbation intensity was permanently halved across all species; we  
311 found as many species with positive as negative responses.

## 312 **3.2 High species variability in response at the edge**

313 There was a high variability in species response at the edge, with several species showing no effect,  
314 or even a higher mean performance at the edge rather than a decrease. This was particularly true for  
315 invasion rate without competition, see for example *Abies alba* or *Picea abies* in Fig. 3. Interestingly,  
316 for these species, stochastic processes might compensate for the lack of effect on mean fitness at the  
317 species level.

318 At the hot edge, among the nine species that did not show a decline of mean fitness or had  
319 contrasted mean fitness response (one metric decreased and the other increased), three were  
320 constrained by the extinction time (see for example *Juniperus thurifera* or *Quercus petraea* in Fig.  
321 3). At the cold edge, it was the case for three out of ten species (see for example, *Pinus uncinata*  
322 or *Pinus nigra* in Fig. 3).

### 323 **3.2.1 Species responses vary with their climatic center**

324 Part of the variability in species response was related to the position of the climatic center of the  
325 species. Several metrics of response at the edge were more severely constrained for species with  
326 niche centers in more extreme climates, Fig. 4. At the hot edge,  $\Omega$  for the invasion rate without  
327 competition, tree density,  $T_0$  and  $T_{half}$  were significantly more strongly reduced for species with  
328 mean climatic positions in hotter and dryer conditions. At the cold edge, only the invasion rate  
329 without competition showed a significant trend, with a stronger reduction in species with a mean  
330 climate in colder conditions. These results were robust to the inclusion of phylogenetic structure in  
331 the residuals; it only affected the relationship of invasion rates at the cold edge, and damping time  
332 at the hot edge (see SI 5).

## 333 **4 Discussion**

334 Despite considerable variation across species, our results show both a consistent decrease in invasion  
335 rate and increase in extinction risk at the hot edge across all species. These patterns were not  
336 observed at the cold edge, where only species occurring in extremely cold climates showed a reduction  
337 in these two metrics. In contrast, we found a decrease in resilience to perturbation at the cold edge  
338 in most species.

### 339 **4.1 Several demographic processes drive species distribution**

#### 340 **4.1.1 Invasion rate (H1)**

341 Our results demonstrate a limitation in the invasion rate (here the net reproductive rate  $R_0$ ) at the  
342 hot edge. This limitation is exacerbated in species that occur in extremely hot and dry climates.  
343 These results are consistent with those of a previous study which found that lifespan decreased at

344 the hot edge (Kunstler et al. 2021). The reduced net reproductive rate at the hot edge is probably  
345 the result of this shorter lifespan, but also of the lower recruitment at this edge (observed for  
346 species occurring in hot climate, see SI 4.1). Previous studies have proposed that competition could  
347 strengthen the limitation on mean fitness at the edge (see Louthan, Doak & Angert 2015). Here  
348 we found only weak evidence for this, as competition increased the number of species with reduced  
349 invasion rate at the edge only from 12 to 14 (see *Quercus petraea* and *Abies alba*, Fig. 3).

350 We found no clear evidence of a general limitation in invasion rate at the cold edge. Only species  
351 distributed at the cold extreme of the gradient showed signs of reduced invasion rate (such as *Betula*  
352 and *Pinus uncinata*). This insight emerged in our new model covering the full life cycle, but not in  
353 Kunstler et al. (2021) who did not report a decrease in survival or lifespan for these species. This  
354 might be driven by a low recruitment rate at the cold edge for species in extremely cold climates  
355 (Figure S15 and S16).

356 We found that the invasion rate in the absence of competition was more strongly constrained  
357 in species from harsh extremes of European climate (hot and dry or cold and wet, hypothesis H5).  
358 In contrast, invasion rate was not limited in climatic conditions typical of temperate regions, where  
359 productivity is high (Jung et al. 2007).

360 Direct comparison with previous studies is difficult as they differ in their way of representing  
361 species distribution and computing mean fitness (Le Squin, Boulangeat & Gravel 2021; Purves  
362 2009; Thuiller et al. 2014). However, even if the structure of the model is different from ours, it is  
363 interesting that Purves (2009), in a study on East North American tree species, found a significant  
364 decrease in invasion rate at the northern edge but not at the southern edge. The fact that fitness  
365 decreases occur at the opposite edges for tree species in East North America and in Europe might  
366 be related to differences in climatic space between these continents. The European southern edge  
367 corresponds to a hot and dry climate, whereas the southern edge of tree species in East North  
368 America is not limited by drought (Zhu, Woodall, Monteiro & Clark 2015).

#### 369 **4.1.2 Demographic stochasticity (H2)**

370 The mean time to extinction represents an integrative metric of the demographic stochasticity which  
371 increases when tree density decreases and demographic variance increases (Ovaskainen & Meerson  
372 2010). At the hot edge among the 10 species showing a shorter time to extinction, this decline could  
373 be related to a change in either demographic variance or tree density or both. This suggests that  
374 these two processes reinforce each other to result in a stronger reduction in the time to extinction.  
375 Our results are also interesting in light of the abundant-center hypothesis (Brown 1984), which  
376 postulates a decrease in tree density at the edge of a species range. Indeed, our analysis of tree  
377 abundance at long term equilibrium showed that this hypothesis is far from being supported for all  
378 edges and species. This is in agreement with previous large-scale analyses of observed tree abundance

379 Dallas, Decker & Hastings (2017), Pironon et al. (2017), and Sagarin & Gaines (2002).

### 380 **4.1.3 Population recovery after disturbances (H3)**

381 Holt, Keitt, Lewis, Maurer & Taper (2005) stated that increases in environmental variability can  
382 explain range limits despite the absence of a decrease in mean fitness. Here, we explored the role of  
383 the time to recovery from disturbances. Disturbance is a key component of environmental variability  
384 for tree species. We found an overall significant increase of damping time at the cold edge. This  
385 changes in a metric of long term recovery might be connected to the slower tree growth at this edge  
386 reported by Kunstler et al. (2021). In contrast, the effect for the short and midterm metrics of  
387 population recovery were extremely variable between species (yet, seven species out of 14 showed a  
388 longer time to return to the equilibrium density). It is noteworthy that these metrics are extracted  
389 from simulations that might lead to a higher variability than the analytical approach used for  
390 damping time. At the hot and dry edge, species variability was extremely large. We found evidence  
391 of an increase of short and midterm metrics only for species with a climatic center in extreme hot  
392 and dry conditions.

393 A key limitation of our approach on disturbance is that we only explored a single type of  
394 abstract disturbance, whereas the real disturbance regime might vary across the species range and  
395 play a role in setting distribution limits (Senf & Seidl 2021; Sheil 2016). In addition, it would be  
396 crucial to also explore how interannual variability in climatic conditions, another key component of  
397 environmental variability, affects population dynamics. Estimating how natural disturbances and  
398 interannual climatic variability might affect tree vital rates and population dynamics at the  
399 continental scale remains, however, challenging.

## 400 **4.2 Stronger constraints at the hot edge (H4)**

401 At the hot and dry edges, we found that the invasion rate was constrained and we observed increased  
402 stochastic risk of extinction for numerous species. Conversely, constraints at the cold edge were less  
403 clear, with an indication of a lower resilience in general and a reduced invasion rate only for species  
404 in extreme cold conditions.

405 These differences might emerge if drought directly results in an increased mortality and higher  
406 extinction risk, whereas cold stress could reduce vital rates and population dynamics and thus  
407 mechanically increase its response time to disturbances. These differences might also reflect a degree  
408 of disequilibrium between the current and potential distribution. Climate change might lead to an  
409 increase in drought pressure at the hot edge (Carnicer et al. 2011) and in contrast a decrease in  
410 mortality at the cold edge in Europe (Neumann, Mues, Moreno, Hasenauer & Seidl 2017).

### 411 **4.3 On the challenges of connecting population dynamics and species** 412 **distribution**

413 It is striking that most studies (including this one) found limited concurrence between mean fitness  
414 and species distribution (Kunstler et al. 2021; Le Squin, Boulangeat & Gravel 2021; Purves 2009;  
415 Thuiller et al. 2014). The novelty of our study is that we show that when mean fitness is not  
416 constrained at the edge, stochastic processes can play a key role. Yet, there is still a large variability  
417 in species responses, with several species having no clear indication of performance constraints or  
418 even better performances at edges (*Salix caprea* and *Larix decidua* at the hot edge and *Juniperus*  
419 *thurifera* at the cold edge). Several factors might explain the results for these species. First,  
420 we explored species distribution in climate space using only two key climatic variables. Even if  
421 these variables discriminate well the distribution of the 25 tree species in Europe (see Fig. S14),  
422 species distribution might be influenced by other climatic variables, or other abiotic factors such as  
423 soil variables. Secondly, beside environmental space, species distribution can also be analyzed in  
424 geographic space (see Pironon et al. 2017). In geographic space, dispersal limitation and decrease  
425 in suitable habitat availability can also explain species range limits in a metapopulation framework  
426 (Holt & Keitt 2000). Thirdly, species distributions are not necessarily in equilibrium with current  
427 climatic conditions. Highly managed species (such as *Pinus pinaster* or *Picea abies*) can be planted  
428 outside their native range. Svenning & Skov (2004) also argued that tree species might still be in  
429 the process of slow recolonization since the last glacial age. Here, by initiating our simulations at  
430 equilibrium, we effectively removed all legacy effects. Then, as discussed above, climate warming  
431 could change constraints at edges (Clark et al. 2021), and explain the difference observed at the hot  
432 *vs.* the cold edge. Finally, our ability to capture the complex population dynamics of long-lived  
433 organisms such as trees is still limited and might explain the poor match with the distribution.  
434 For instance, our models do not consider potential variability in seed production, juvenile growth  
435 or survival, which could however also constrain species ranges (Clark et al. 2021). In addition,  
436 we explored the role of competition in a relative crude way, considering the competitor effect only  
437 through basal area and ignoring the complexity of multispecies interactions. A full exploration of  
438 its role would require analysing how the stochastic dynamics of multispecies community constrains  
439 species range (Godsoe, Jankowski, Holt & Gravel 2017).

### 440 **4.4 Conclusion**

441 Our study is one of the first to tease apart several mechanisms that could lead to species range  
442 limits using field data across a large set of species at the continental scale. Our results show that  
443 the mean fitness may not be the only mechanism at play at the edge; demographic stochasticity and  
444 population recovery ability also matter for European tree species. Thus, to understand how climate

445 change will drive species range shifts, we encourage ecologists to analyse the full life cycle of trees  
446 and explore how the average population growth rate interacts with stochastic processes and recovery  
447 from disturbances in driving species ranges.

448 **Acknowledgments** This work was funded by the REFORCE - EU FP7 ERA-NET Sumforest  
449 2016 through the call “Sustainable forests for the society of the future”, with the ANR as national  
450 funding agency (grant ANR-16-SUMF-0002). GK was funded by the ANR DECLIC (grant  
451 ANR-20-CE32-0005-01). GK and BR were funded by BiodivERsA ERA-NET Cofund project  
452 FUNPOTENTIAL (ANR funding grant number ANR-20-EBI5-0005-03) and RESONATE H2020  
453 project (grant 101000574). The NFI data synthesis was conducted within the FunDivEUROPE  
454 project funded by the European Union’s Seventh Programme (FP7/2007–2013) under grant  
455 agreement No. 265171. We thank Gerald Kandler (Forest Research Institute Baden-Wurttemberg)  
456 for his help building the German data. We thank the MITECO (“Ministerio para la Transición  
457 Ecológica y Reto Demográfico”), the Johann Heinrich von Thunen-Institut, the Natural Resources  
458 Institute Finland (LUKE), the Swedish University of Agricultural Sciences, and the French Forest  
459 Inventory (IGN) for making NFI data available. GK, SR, and RSG initiated this work in the  
460 working group sAPROPOS - ‘Analysis of PROjections of POPulationS’, which was supported by  
461 sDiv (Synthesis Centre of the German Centre for Integrative Biodiversity Research - iDiv), funded  
462 by the German Research Foundation (FZT 118). MAZ was supported by grant DARE  
463 (RTI2018-096884-B-C32, MCINN, Spain). We are grateful to Fabian Roger for providing code to  
464 build the species phylogeny.



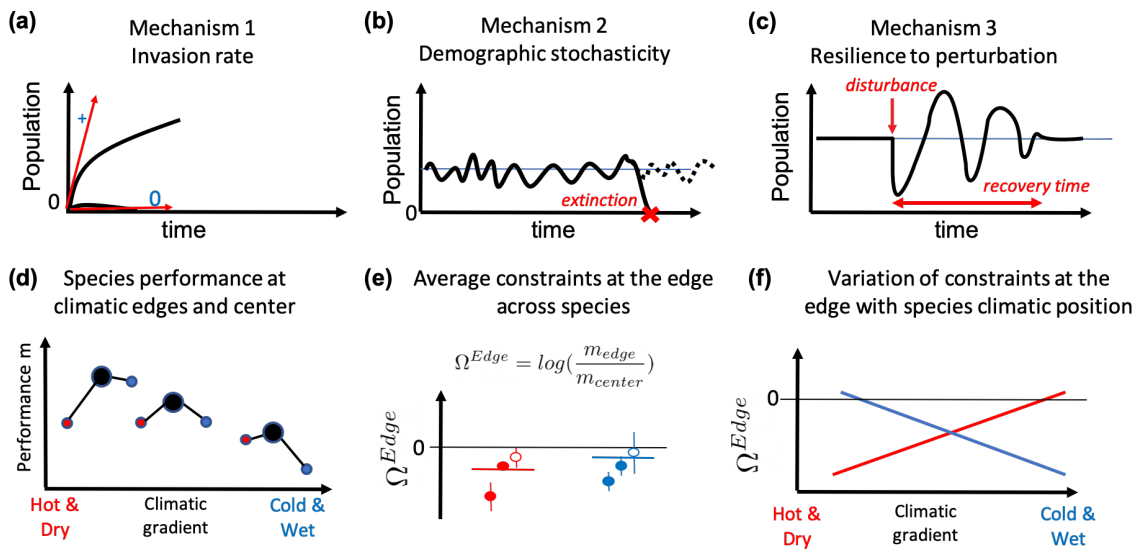

Figure 1: Conceptual figure illustrating the three groups of mechanisms that could limit species distribution at their edges proposed by Holt *et al.* (2005) (a, b, and c), and the approach to test their responses at the hot and dry or the cold and wet edges, and their variation depending on species climatic center (d, e, and f). (a) Mean fitness is estimated by the invasion rate as the population's ability to grow when rare (black lines represent two different population trajectories of invaders and the red arrows their estimated invasion rates), (b) demographic stochasticity is measured as the variability of tree density solely due to stochasticity of vital rates and its effect on the risk of stochastic extinction (lines represents stochastic tree density variations in small populations that results in extinction for the solid line at the red cross), (c) resilience to disturbance is measured as the recovery time of a tree population after disturbance (represented by the red arrow). (d) Values of population performances  $m$  for three species at their climatic niche center (black circle), hot and dry edge (red circle) and cold and wet edge (blue circle) (value along the x-axis represents their positions on the climatic gradient), (e) index of response at the edge in comparison to the center –  $\Omega^{edge}$  for the three species, filled points represent significant species responses and the horizontal line represents the overall effect allowing to test if there is a general response of  $\Omega$  across all species, (f) variations of  $\Omega$  with species' climatic niche center (i.e. median of their positions along the climatic axis). The three graphics present the expected results according to our hypotheses: population performance decline at the edges which is equivalent to  $\Omega < 0$  at each edge, and  $\Omega$  decrease is stronger at the hot and dry edges of species occurring in hot climate and at the cold and wet edge of species occurring in cold climate. See Materials and Methods for a full description of the metrics,  $\Omega$ , and the statistical tests.



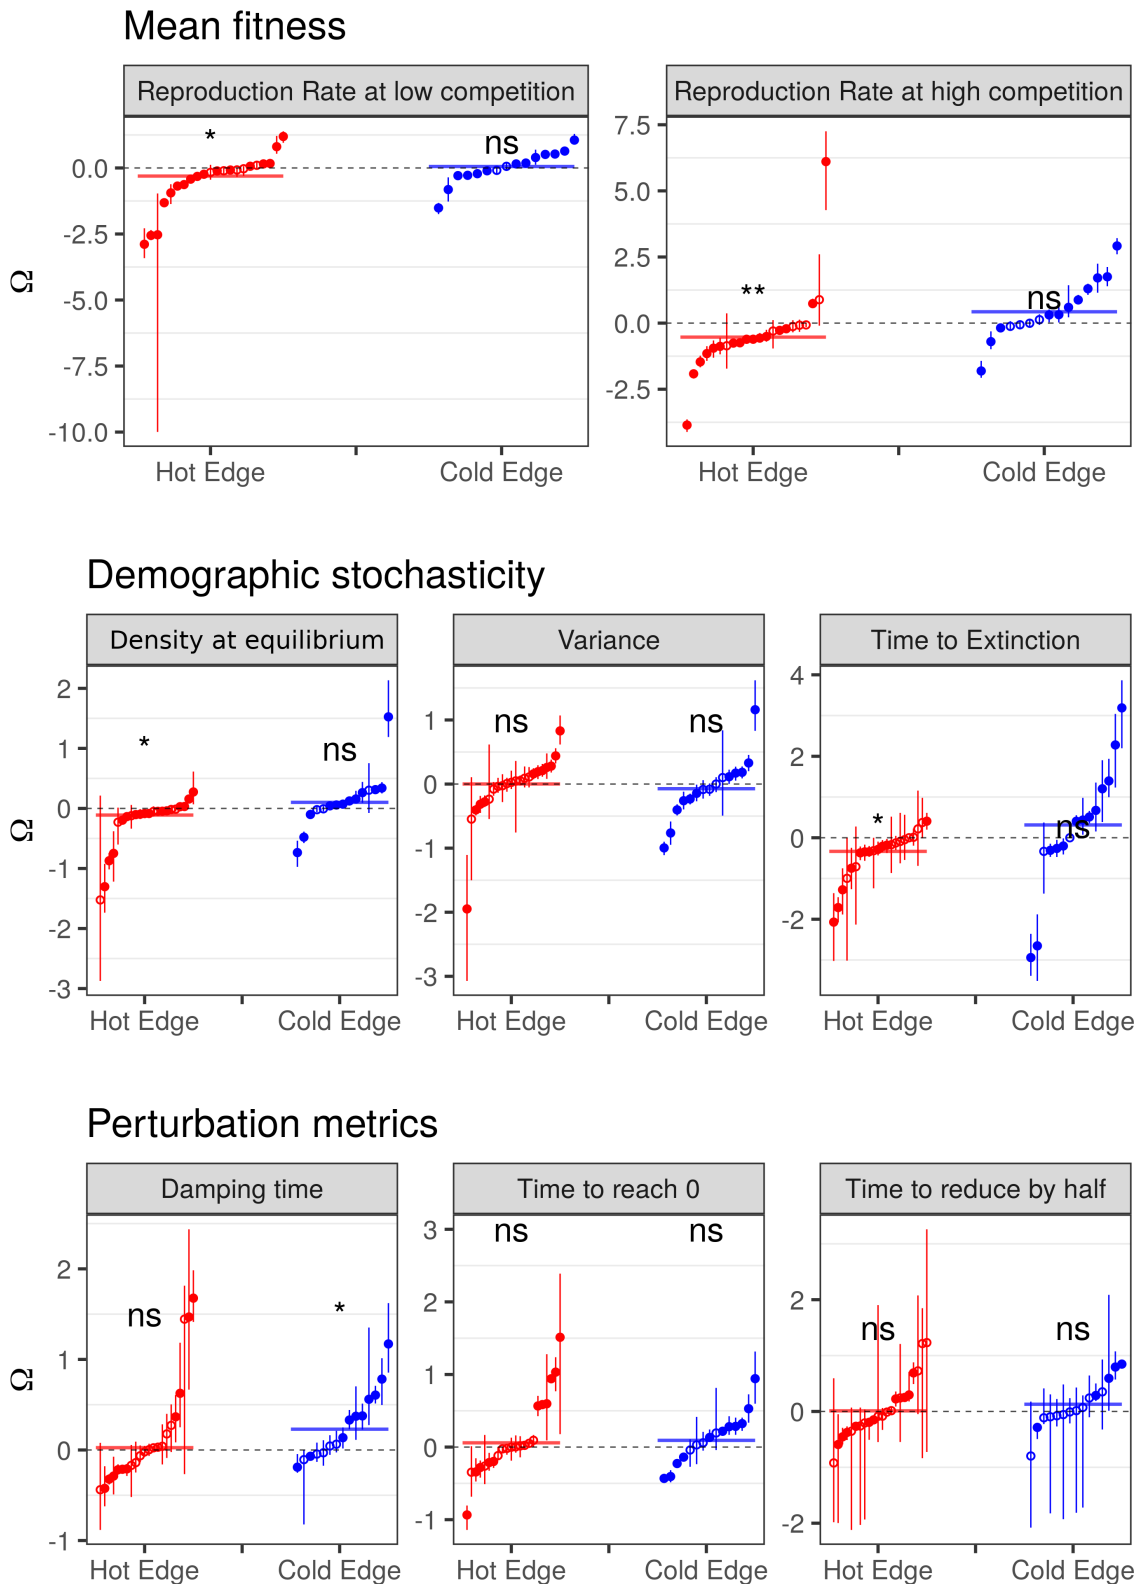

Figure 2: Relative metrics  $\Omega$  by edge. Each symbol represents a species, error bar is the range of 5 and 95 percentiles. Relative metrics significantly different from 0 (see text) are represented by full circles, otherwise by empty circles. Colored thick horizontal lines represent the edge effect on relative metrics over all species (variable  $K$  in equation 2). Significance of relative metrics over all species (see text) is shown with a symbol (ns/\*)

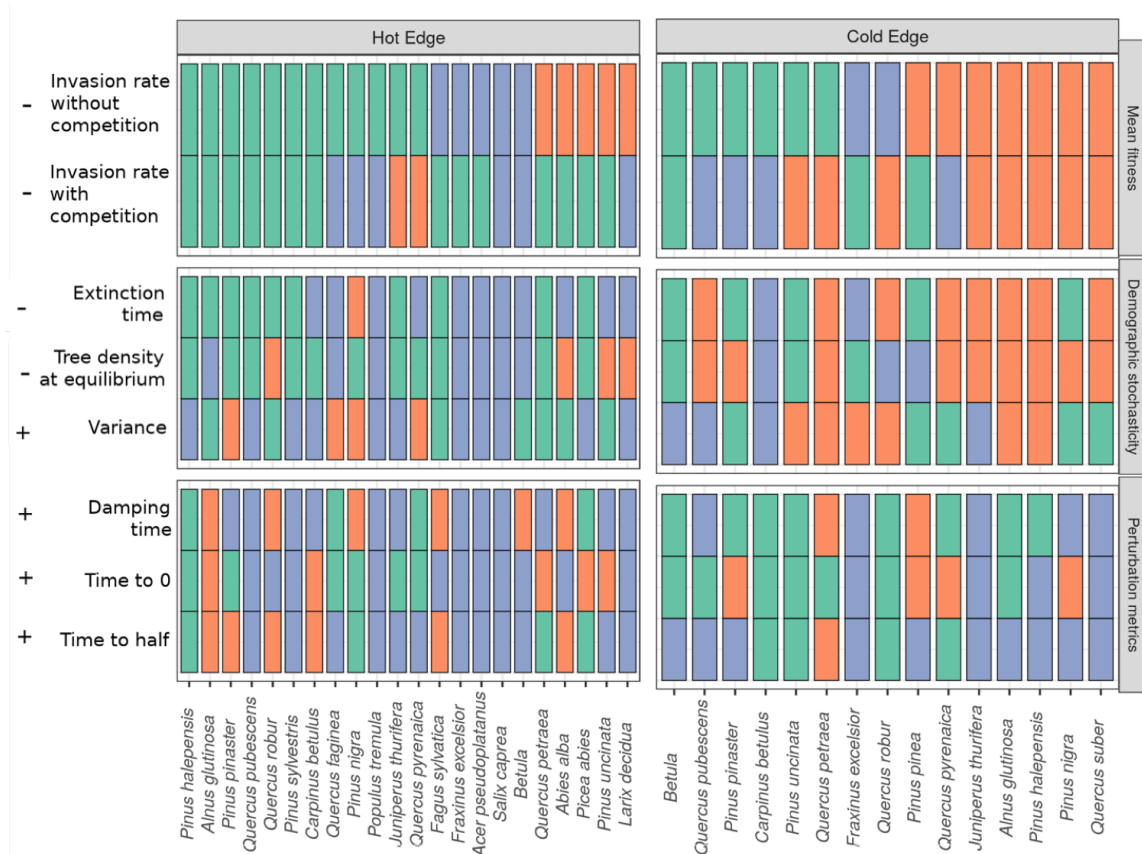

Figure 3: Direction and significance of relative differences of the population performance metrics between edges and climatic center ( $\Omega$ ) for each analysed species at hot and dry edge and the cold and wet edges. Species are ordered from the one showing a significant reduction of invasion rate on the left to the one with opposed response on the right. Green indicates significant constraints on the metric in agreement with the expected direction (expected direction are indicated by - and + signs on the left, decrease or increase in the metric), red indicates a significant effect in opposed direction, and blue indicates a non-significant response.

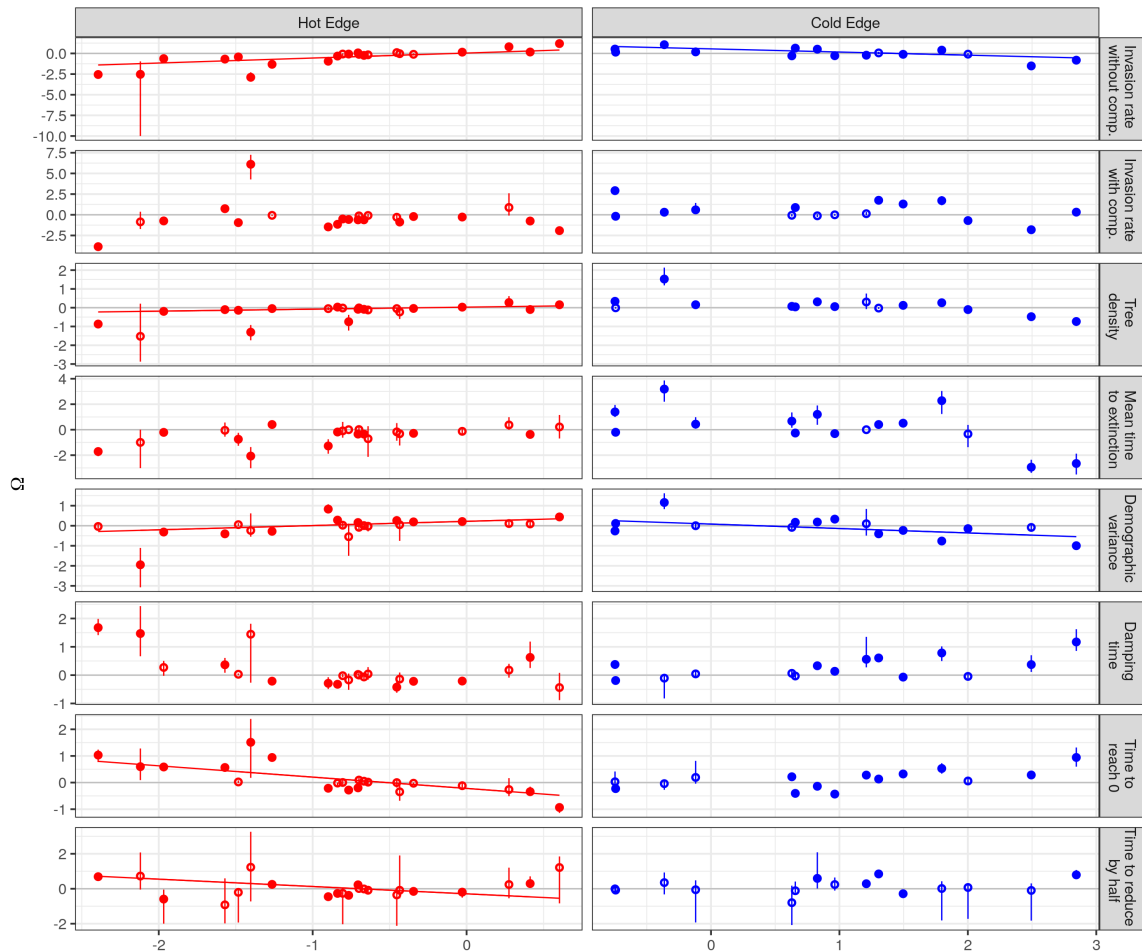

Figure 4: Relative differences of the population performance metrics between edges and climatic center ( $\Omega$ ) along the first principal component axis of species mean climatic conditions. Regression lines are plotted when significant (p-value below 5%). Species relative metrics significantly different from 0 (see text) are represented by full circles, otherwise by empty circles.

## References

- 465
- 466 Baeten, L. et al. (2013) A Novel Comparative Research Platform Designed to Determine the  
467 Functional Significance of Tree Species Diversity in European Forests. en. *Perspect. Plant Ecol.*  
468 *Evol. Syst.*, **15**, 281–291.
- 469 Bates, D. et al. (2014) Fitting linear mixed-effects models using lme4. *arXiv preprint*  
470 *arXiv:1406.5823*,
- 471 Brooks, M. E. et al. (2017) glmmTMB Balances Speed and Flexibility Among Packages for Zero-  
472 inflated Generalized Linear Mixed Modeling. *The R Journal*, **9**, 378–400.
- 473 Brown, J. H. (1984) On the relationship between abundance and distribution of species. *Am. Nat.*,  
474 **124**, 255–279.
- 475 Burnham, K. P. & Anderson, D. R. (2002) *Model selection and multimodel inference, A practical*  
476 *information-theoretic approach*, Springer New York.
- 477 Capdevila, P. et al. (2020) Towards a comparative framework of demographic resilience. *Trends Ecol.*  
478 *Evol.*, **35**, 776–786.
- 479 Carnicer, J. et al. (2011) Widespread crown condition decline, food web disruption, and amplified tree  
480 mortality with increased climate change-type drought. *Proc. Natl. Acad. Sci.*, **108**, 1474–1478.
- 481 Cheaib, A. et al. (2012) Climate change impacts on tree ranges: model intercomparison facilitates  
482 understanding and quantification of uncertainty. *Ecol. Lett.*, **15**, 533–544.
- 483 Clark, J. S. et al. (2021) Continent-Wide Tree Fecundity Driven by Indirect Climate Effects. en.  
484 *Nat. Commun.*, **12**, 1242.
- 485 Csargo, A. M. et al. (2017) Less Favourable Climates Constrain Demographic Strategies in Plants.  
486 *Ecol. Lett.*, **20**, 969–980.
- 487 Dallas, T., Decker, R. R. & Hastings, A. (2017) Species are not most abundant in the centre of their  
488 geographic range or climatic niche. *Ecol. Lett.*, **20**, 1526–1533.
- 489 Easterling, M. R., Ellner, S. P. & Dixon, P. M. (2000) Size-specific sensitivity: applying a new  
490 structured population model. *Ecology*, **81**, 694–708.
- 491 Ellner, S. P., Childs, D. Z., Rees, M., et al. (2016) *Data-driven modelling of structured populations*,  
492 Springer.
- 493 Engen, S., Sæther, B.-E. & Møller, A. P. (2001) Stochastic population dynamics and time to  
494 extinction of a declining population of barn swallows. *J. Anim. Ecol.*, **70**, 789–797.
- 495 Engen, S. et al. (2009) Reproductive value and the stochastic demography of age-structured  
496 populations. *Am. Nat.*, **174**, 795–804.
- 497 Falster, D. S. et al. (2017) Multitrait successional forest dynamics enable diverse competitive  
498 coexistence. *Proc. Natl. Acad. Sci.*, **114**, E2719–E2728.
- 499 Godsoe, W. et al. (2017) Integrating Biogeography with Contemporary Niche Theory. *Trends Ecol.*  
500 *Evol.*, **32**, 488–499.

- 501 Grimm, V. & Wissel, C. (2004) The intrinsic mean time to extinction: a unifying approach to  
502 analysing persistence and viability of populations. *Oikos*, **105**, 501–511.
- 503 Grubb, P. J. (1977) The Maintenance of Species-Richness in Plant Communities: The Importance  
504 of the Regeneration Niche. *Biological Review*, **52**, 107–145.
- 505 Harris, I. et al. (2014) Updated high-resolution grids of monthly climatic observations—the CRU  
506 TS3. 10 Dataset. *Int. J. Climatol.*, **34**, 623–642.
- 507 Holt, R. D. & Keitt, T. H. (2000) Alternative Causes for Range Limits: A Metapopulation  
508 Perspective. *Ecol. Lett.*, **3**, 41–47.
- 509 Holt, R. D. et al. (2005) Theoretical models of species’ borders: single species approaches. *Oikos*,  
510 **108**, 18–27.
- 511 Hutchinson, G. E. (1978) *An introduction to population ecology*.
- 512 Jaffré, M. & Le Galliard, J.-F. (2016) Population viability analysis of plant and animal populations  
513 with stochastic integral projection models. *Oecologia*, **182**, 1031–1043.
- 514 Jung, M. et al. (2007) Uncertainties of modeling gross primary productivity over Europe: A  
515 systematic study on the effects of using different drivers and terrestrial biosphere models.  
516 *Global Biogeochem. Cycles*, **21**, GB4021.
- 517 Kunstler, G. et al. (2021) Demographic Performance of European Tree Species at Their Hot and  
518 Cold Climatic Edges. *J. Ecol.*, **109**, 1041–1054.
- 519 Le Squin, A., Boulangeat, I. & Gravel, D. (2021) Climate-induced variation in the demography of 14  
520 tree species is not sufficient to explain their distribution in eastern North America. *Global Ecol*  
521 *Biogeogr.*, **30**, 352–369.
- 522 Louthan, A. M., Doak, D. F. & Angert, A. L. (2015) Where and When Do Species Interactions Set  
523 Range Limits? *Trends Ecol. Evol.*, **30**, 780–792.
- 524 Mauri, A., Strona, G. & San-Miguel-Ayanz, J. (2017) EU-Forest, a high-resolution tree occurrence  
525 dataset for Europe. *Scientific data*, **4**, 1–8.
- 526 Melbourne, B. A. (2012) Demographic Stochasticity. *and Gross J., editor., editors. Sourcebook in*  
527 *theoretical ecology. University of California Press, Berkeley, California, USA.*,
- 528 Moreno, A. & Hasenauer, H. (2016) Spatial downscaling of European climate data. *Int. J. Climatol.*,  
529 **36**, 1444–1458.
- 530 Morris, W. K., Vesk, P. A. & McCarthy, M. A. (2013) Profiting from pilot studies: Analysing  
531 mortality using Bayesian models with informative priors. *Basic Appl Ecol*, **14**, 81–89.
- 532 Neumann, M. et al. (2017) Climate variability drives recent tree mortality in Europe. *Glob. Change*  
533 *Biol.*, **23**, 4788–4797.
- 534 Ovaskainen, O. & Meerson, B. (2010) Stochastic models of population extinction. *Trends Ecol. Evol.*,  
535 **25**, 643–652.

- 536 Pagel, J. et al. (2020) Mismatches between demographic niches and geographic distributions are  
537 strongest in poorly dispersed and highly persistent plant species. *Proc. Natl. Acad. Sci.*, **117**,  
538 3663–3669.
- 539 Pironon, S. et al. (2017) Geographic Variation in Genetic and Demographic Performance: New  
540 Insights from an Old Biogeographical Paradigm: The Centre-Periphery Hypothesis. en. *Biol.*  
541 *Rev.*, **92**, 1877–1909.
- 542 Purves, D. W. (2009) The Demography of Range Boundaries versus Range Cores in Eastern US  
543 Tree Species. *Proceedings of the Royal Society B: Biological Sciences*, **276**, 1477–1484.
- 544 R Core Team (2021). *R: A Language and Environment for Statistical Computing*. R Foundation for  
545 Statistical Computing, Vienna, Austria.
- 546 Ratcliffe, S. et al. (2020) Forest Inventory data from Finland and Sweden for: Demographic  
547 performance of 378 European tree species at their hot and cold climatic edges, plus ancillary  
548 climate data. *Dryad dataset*,
- 549 Ratcliffe, S. et al. (2017) Biodiversity and ecosystem functioning relations in European forests depend  
550 on environmental context. *Ecol. Lett.*, **20**, 1414–1426.
- 551 Rebarber, R., Tenhumberg, B. & Townley, S. (2012) Global asymptotic stability of density dependent  
552 integral population projection models. *Theor. Popul. Biol.*, **81**, 81–87.
- 553 Sagarin, R. D. & Gaines, S. D. (2002) The ‘abundant centre’ distribution: to what extent is it a  
554 biogeographical rule? *Ecol. Lett.*, **5**, 137–147.
- 555 Schurr, F. M. et al. (2012) How to understand species’ niches and range dynamics: a demographic  
556 research agenda for biogeography. *J. Biogeogr.*, **39**, 2146–2162.
- 557 Seidl, R. et al. (2017) Forest Disturbances under Climate Change. *Nat. Clim. Chang.*, **7**, 395–402.
- 558 Senf, C. & Seidl, R. (2021) Storm and Fire Disturbances in Europe: Distribution and Trends. *Glob.*  
559 *Chang. Biol.*, **27**, 3605–3619.
- 560 Sexton, J. P. et al. (2009) Evolution and Ecology of Species Range Limits. *Annu. Rev. Ecol. Evol.*  
561 *Syst.*, **40**, 415–436.
- 562 Sheil, D. (2016) Disturbance and distributions: avoiding exclusion in a warming world. *Ecol. Soc.*,  
563 **21**, 10.
- 564 Svenning, J.-C. & Skov, F. (2004) Limited Filling of the Potential Range in European Tree Species.  
565 *Ecol. Lett.*, **7**, 565–573.
- 566 Symonds, M. R. & Blomberg, S. P. (2014). A primer on phylogenetic generalised least squares.  
567 *Modern phylogenetic comparative methods and their application in evolutionary biology* (ed. by  
568 ), pp. 105–130. Springer.
- 569 Thuiller, W. et al. (2009) BIOMOD—a platform for ensemble forecasting of species distributions.  
570 *Ecography*, **32**, 369–373.



- 571 Thuiller, W. et al. (2014) Does probability of occurrence relate to population dynamics? *Ecography*,  
572 **37**, 1155–1166.
- 573 Townley, S., Rebarber, R. & Tenhumberg, B. (2012) Feedback control systems analysis of density  
574 dependent population dynamics. *Syst. Control. Lett.*, **61**, 309–315.
- 575 Zhu, K. et al. (2015) Prevalence and strength of density-dependent tree recruitment. *Ecology*, **96**,  
576 2319–2327.
